# Supplementary material
Source: MDPI journal article supplement (https://www.mdpi.com/2674-0710/2/4/12)

# Pangenome analysis reveals a high degree of genetic diversity in *Gardnerella vaginalis*: an *in silico* approach

Supplementary material:

**Supplementary Table S1**

| Organism                     | Strain                  | Assembly Level    | Size (Mb) | GC%  | Genbank Access  |
|------------------------------|-------------------------|-------------------|-----------|------|-----------------|
| <i>Gardnerella vaginalis</i> | NCTC10287               | <i>Complete</i>   | 1.67      | 41.4 | GCA_900637625.1 |
| <i>Gardnerella vaginalis</i> | GV37                    | <i>Complete</i>   | 1.75      | 41.8 | GCA_001953155.1 |
| <i>Gardnerella vaginalis</i> | FDAARGOS_568            | <i>Complete</i>   | 1.72      | 41.3 | GCA_003812765.1 |
| <i>Gardnerella vaginalis</i> | 409-05                  | <i>Complete</i>   | 1.62      | 42   | GCA_000025205.1 |
| <i>Gardnerella vaginalis</i> | ATCC 14018/<br>JCM11026 | <i>Complete</i>   | 1.67      | 41.4 | GCA_001042655.1 |
| <i>Gardnerella vaginalis</i> | ATCC 14019              | <i>Complete</i>   | 1.67      | 41.4 | GCA_000159155.2 |
| <i>Gardnerella vaginalis</i> | HMP9231                 | <i>Complete</i>   | 1.73      | 41.4 | GCA_000213955.1 |
| <i>Gardnerella vaginalis</i> | DSM 4944                | <i>Chromosome</i> | 1.68      | 41.3 | GCA_900105405.1 |
| <i>Gardnerella vaginalis</i> | UMB0913                 | <i>Scaffold</i>   | 1.51      | 42.1 | GCA_002861145.1 |
| <i>Gardnerella vaginalis</i> | UMB0736                 | <i>Scaffold</i>   | 1.73      | 41.1 | GCA_013315025.1 |

|                              |          |                 |      |      |                     |
|------------------------------|----------|-----------------|------|------|---------------------|
| <i>Gardnerella vaginalis</i> | UMB0298  | <i>Scaffold</i> | 1.68 | 41.2 | GCA_002861975.<br>1 |
| <i>Gardnerella vaginalis</i> | JCP7672  | <i>Scaffold</i> | 1.69 | 41.2 | GCA_000414645.<br>1 |
| <i>Gardnerella vaginalis</i> | JCP8108  | <i>Scaffold</i> | 1.67 | 41.1 | GCA_000414525.<br>1 |
| <i>Gardnerella vaginalis</i> | UMB0833  | <i>Scaffold</i> | 1.62 | 42.1 | GCA_002861885.<br>1 |
| <i>Gardnerella vaginalis</i> | JCP7659  | <i>Scaffold</i> | 1.54 | 41.9 | GCA_000414665.<br>1 |
| <i>Gardnerella vaginalis</i> | JCP8070  | <i>Scaffold</i> | 1.48 | 42.2 | GCA_000414545.<br>1 |
| <i>Gardnerella vaginalis</i> | UMB1698  | <i>Scaffold</i> | 1.6  | 41.5 | GCA_013315145.<br>1 |
| <i>Gardnerella vaginalis</i> | UMB 1686 | <i>Scaffold</i> | 1.5  | 43   | GCA_002884775.<br>1 |
| <i>Gardnerella vaginalis</i> | UMB 1642 | <i>Contig</i>   | 1.5  | 41.5 | GCA_002884795.<br>1 |
| <i>Gardnerella vaginalis</i> | UMB 1489 | <i>Scaffold</i> | 1.5  | 42   | GCA_013315195.<br>1 |
| <i>Gardnerella vaginalis</i> | UMB 1350 | <i>Scaffold</i> | 1.5  | 42   | GCA_013315125.<br>1 |
| <i>Gardnerella vaginalis</i> | UMB 0912 | <i>Scaffold</i> | 1.5  | 42   | GCA_002861125.<br>1 |
| <i>Gardnerella vaginalis</i> | UMB0830  | <i>Scaffold</i> | 1.6  | 42   | GCA_002861905.<br>1 |
| <i>Gardnerella vaginalis</i> | UMB0775  | <i>Contig</i>   | 1.7  | 41   | GCA_002861925.<br>1 |

|                              |         |                 |     |    |                     |
|------------------------------|---------|-----------------|-----|----|---------------------|
| <i>Gardnerella vaginalis</i> | UMB0770 | <i>Scaffold</i> | 1.7 | 41 | GCA_002861945.<br>1 |
| <i>Gardnerella vaginalis</i> | UMB0769 | <i>Contig</i>   | 1.6 | 42 | GCA_013315215.<br>1 |
| <i>Gardnerella vaginalis</i> | UMB0768 | <i>Contig</i>   | 1.7 | 41 | GCA_002884835.<br>1 |
| <i>Gardnerella vaginalis</i> | UMB0742 | <i>Contig</i>   | 1.5 | 42 | GCA_013315135.<br>1 |
| <i>Gardnerella vaginalis</i> | UMB0682 | <i>Contig</i>   | 1.6 | 42 | GCA_002862065.<br>1 |
| <i>Gardnerella vaginalis</i> | UMB0662 | <i>Scaffold</i> | 1.5 | 42 | GCA_013315255.<br>1 |
| <i>Gardnerella vaginalis</i> | UMB0558 | <i>Scaffold</i> | 1.6 | 42 | GCA_013315115.<br>1 |
| <i>Gardnerella vaginalis</i> | UMB0540 | <i>Scaffold</i> | 1.6 | 41 | GCA_013315045.<br>1 |
| <i>Gardnerella vaginalis</i> | UMB0388 | <i>Scaffold</i> | 2   | 40 | GCA_002871555.<br>1 |
| <i>Gardnerella vaginalis</i> | UMB0386 | <i>Scaffold</i> | 1.7 | 41 | GCA_002861965.<br>1 |
| <i>Gardnerella vaginalis</i> | UMB0358 | <i>Scaffold</i> | 1.7 | 41 | GCA_013315085.<br>1 |
| <i>Gardnerella vaginalis</i> | UMB0264 | <i>Scaffold</i> | 1.5 | 42 | GCA_002884875.<br>1 |
| <i>Gardnerella vaginalis</i> | UMB0233 | <i>Contig</i>   | 1.6 | 41 | GCA_002862045.<br>1 |
| <i>Gardnerella vaginalis</i> | UMB0202 | <i>Scaffold</i> | 1.7 | 41 | GCA_013315075.<br>1 |

|                              |             |                 |     |      |                     |
|------------------------------|-------------|-----------------|-----|------|---------------------|
| <i>Gardnerella vaginalis</i> | UMB0170     | <i>Scaffold</i> | 1.5 | 42   | GCA_002884855.<br>1 |
| <i>Gardnerella vaginalis</i> | UMB0143     | <i>Scaffold</i> | 1.6 | 41   | GCA_013315005.<br>1 |
| <i>Gardnerella vaginalis</i> | UMB0061     | <i>scaffold</i> | 1.7 | 41   | GCA_002861165.<br>1 |
| <i>Gardnerella vaginalis</i> | UMB0032B    | <i>Scaffold</i> | 1.7 | 41   | GCA_002862005.<br>1 |
| <i>Gardnerella vaginalis</i> | UMB0032A    | <i>Scaffold</i> | 1.7 | 41   | GCA_002862015.<br>1 |
| <i>Gardnerella vaginalis</i> | UGent 25.49 | <i>Scaffold</i> | 1.7 | 41   | GCA_003397605.<br>1 |
| <i>Gardnerella vaginalis</i> | UGent 21.28 | <i>Scaffold</i> | 1.5 | 42   | GCA_003397615.<br>1 |
| <i>Gardnerella vaginalis</i> | UGent 09.48 | <i>Scaffold</i> | 1.5 | 42   | GCA_003397635.<br>1 |
| <i>Gardnerella vaginalis</i> | UGent 09.07 | <i>Scaffold</i> | 1.7 | 41   | GCA_003397665.1     |
| <i>Gardnerella vaginalis</i> | UGent 09.01 | <i>Scaffold</i> | 2   | 41   | GCA_003397755.<br>1 |
| <i>Gardnerella vaginalis</i> | PSS_7772B   | <i>Scaffold</i> | 159 | 42.5 | GCA_001546485.<br>1 |
| <i>Gardnerella vaginalis</i> | NR039       | <i>Scaffold</i> | 1.9 | 41   | GCA_003585755.<br>1 |
| <i>Gardnerella vaginalis</i> | NR038       | <i>Scaffold</i> | 1.9 | 41   | GCA_003585655.<br>1 |
| <i>Gardnerella vaginalis</i> | NR010       | <i>Scaffold</i> | 1.6 | 45   | GCA_003408845.<br>1 |

|                              |                 |                 |     |      |                     |
|------------------------------|-----------------|-----------------|-----|------|---------------------|
| <i>Gardnerella vaginalis</i> | N95             | <i>Contig</i>   | 1.5 | 42   | GCA_003369965.<br>1 |
| <i>Gardnerella vaginalis</i> | N72             | <i>Scaffold</i> | 1.6 | 41.5 | GCA_003408815.<br>1 |
| <i>Gardnerella vaginalis</i> | N165            | <i>Scaffold</i> | 1.7 | 41   | GCA_003408785.<br>1 |
| <i>Gardnerella vaginalis</i> | N160            | <i>Scaffold</i> | 1.5 | 43   | GCA_003408775.<br>1 |
| <i>Gardnerella vaginalis</i> | N153            | <i>Contig</i>   | 1.5 | 42   | GCA_003369935.<br>1 |
| <i>Gardnerella vaginalis</i> | N144            | <i>Scaffold</i> | 1.6 | 42   | GCA_003408835.<br>1 |
| <i>Gardnerella vaginalis</i> | N101            | <i>Contig</i>   | 1.5 | 42   | GCA_003369895.<br>1 |
| <i>Gardnerella vaginalis</i> | MGYG-HGUT-00021 | <i>Scaffold</i> | 1.9 | 40   | GCA_902362445.<br>1 |
| <i>Gardnerella vaginalis</i> | KA00225         | <i>Contig</i>   | 1.7 | 40.5 | GCA_002896555.<br>1 |
| <i>Gardnerella vaginalis</i> | GS 10234        | <i>Scaffold</i> | 1.6 | 41.5 | GCA_003397745.<br>1 |
| <i>Gardnerella vaginalis</i> | GH019           | <i>Scaffold</i> | 1.5 | 42   | GCA_003426565.<br>1 |
| <i>Gardnerella vaginalis</i> | GH015           | <i>Scaffold</i> | 1.6 | 40.5 | GCA_003408745.<br>1 |
| <i>Gardnerella vaginalis</i> | GED7760B        | <i>Scaffold</i> | 1.5 | 43   | GCA_001546455.<br>1 |
| <i>Gardnerella vaginalis</i> | GED7275B        | <i>Scaffold</i> | 1.5 | 42   | GCA_001546445.<br>1 |

|                              |                         |                 |      |      |                     |
|------------------------------|-------------------------|-----------------|------|------|---------------------|
| <i>Gardnerella vaginalis</i> | FDAARGOS_296            | <i>Contig</i>   | 1.8  | 41   | GCA_002206225.<br>2 |
| <i>Gardnerella vaginalis</i> | DNF01149                | <i>Contig</i>   | 1.7  | 41   | GCA_002894105.<br>1 |
| <i>Gardnerella vaginalis</i> | CMW7778B                | <i>Scaffold</i> | 1.6  | 38   | GCA_001563665.<br>1 |
| <i>Gardnerella vaginalis</i> | ATCC_49145_barcode10_01 | <i>Contig</i>   | 1.7  | 41   | GCA_003034925.<br>1 |
| <i>Gardnerella vaginalis</i> | 3549624                 | <i>Contig</i>   | 1.7  | 41   | GCA_001049785.<br>1 |
| <i>Gardnerella vaginalis</i> | 23-12                   | <i>Scaffold</i> | 1.6  | 41.5 | GCA_001660735.<br>1 |
| <i>Gardnerella vaginalis</i> | 18-4                    | <i>Scaffold</i> | 1.6  | 42   | GCA_001660755.<br>1 |
| <i>Gardnerella vaginalis</i> | 14019_MetR              | <i>Contig</i>   | 1.7  | 41   | GCA_001278345.<br>1 |
| <i>Gardnerella vaginalis</i> | 14018c                  | <i>Contig</i>   | 1.7  | 41   | GCA_004336715.<br>1 |
| <i>Gardnerella vaginalis</i> | 06-12-0010              | <i>Contig</i>   | 1.7  | 41   | GCA_014857145.<br>1 |
| <i>Gardnerella vaginalis</i> | JCP8522                 | <i>Scaffold</i> | 1.5  | 42   | GCA_000414425.<br>1 |
| <i>Gardnerella vaginalis</i> | JCP8481B                | <i>Scaffold</i> | 1.6  | 42.5 | GCA_000414445.<br>1 |
| <i>Gardnerella vaginalis</i> | JCP8481A                | <i>Scaffold</i> | 1.6  | 42.5 | GCA_000414465.<br>1 |
| <i>Gardnerella vaginalis</i> | JCP8151B                | <i>Scaffold</i> | 1.55 | 42   | GCA_000414485.<br>1 |

|                              |              |                 |      |      |                     |
|------------------------------|--------------|-----------------|------|------|---------------------|
| <i>Gardnerella vaginalis</i> | JCP8151A     | <i>Scaffold</i> | 1.56 | 42   | GCA_000414505.<br>1 |
| <i>Gardnerella vaginalis</i> | JCP8066      | <i>Scaffold</i> | 1.52 | 42   | GCA_000414565.<br>1 |
| <i>Gardnerella vaginalis</i> | JCP8017B     | <i>Scaffold</i> | 1.6  | 42   | GCA_000414585.<br>1 |
| <i>Gardnerella vaginalis</i> | JCP8017A     | <i>Scaffold</i> | 1.6  | 42   | GCA_000414605.<br>1 |
| <i>Gardnerella vaginalis</i> | JCP7719      | <i>Scaffold</i> | 1.6  | 42   | GCA_000414625.<br>1 |
| <i>Gardnerella vaginalis</i> | JCP7276      | <i>Scaffold</i> | 1.7  | 40.5 | GCA_000414685.<br>1 |
| <i>Gardnerella vaginalis</i> | JCP7275      | <i>Scaffold</i> | 1.6  | 40.5 | GCA_000414705.<br>1 |
| <i>Gardnerella vaginalis</i> | ATCC_14018_2 | <i>Contig</i>   | 1.7  | 41   | GCA_003397685.<br>1 |
| <i>Gardnerella vaginalis</i> | ATCC_14018_3 | <i>Contig</i>   | 1.7  | 41   | GCA_004336685.<br>1 |
| <i>Gardnerella vaginalis</i> | ATCC_14018_4 | <i>Scaffold</i> | 1.6  | 41   | GCA_000178355.<br>1 |
| <i>Gardnerella vaginalis</i> | AMD          | <i>Contig</i>   | 1.6  | 42   | GCA_000176475.<br>1 |
| <i>Gardnerella vaginalis</i> | 75712        | <i>Contig</i>   | 1.7  | 41   | GCA_000263535.<br>1 |
| <i>Gardnerella vaginalis</i> | 6420B        | <i>Contig</i>   | 1.5  | 42   | GCA_000263575.<br>1 |
| <i>Gardnerella vaginalis</i> | 6119V5       | <i>Contig</i>   | 1.5  | 43   | GCA_000263655.<br>1 |

|                              |             |               |      |      |                     |
|------------------------------|-------------|---------------|------|------|---------------------|
| <i>Gardnerella vaginalis</i> | 55152       | <i>Contig</i> | 1.6  | 41   | GCA_000263475.<br>1 |
| <i>Gardnerella vaginalis</i> | 5-1         | <i>Contig</i> | 1.67 | 42   | GCA_000176495.<br>1 |
| <i>Gardnerella vaginalis</i> | 41V         | <i>Contig</i> | 1.7  | 41   | GCA_000165635.<br>2 |
| <i>Gardnerella vaginalis</i> | 315-A       | <i>Contig</i> | 1.7  | 41   | GCA_000214315.<br>2 |
| <i>Gardnerella vaginalis</i> | 284V        | <i>Contig</i> | 1.7  | 41   | GCA_000263435.<br>1 |
| <i>Gardnerella vaginalis</i> | 1500E       | <i>Contig</i> | 1.5  | 42.5 | GCA_000263595.<br>1 |
| <i>Gardnerella vaginalis</i> | 1400E       | <i>Contig</i> | 1.7  | 41   | GCA_000263495.<br>1 |
| <i>Gardnerella vaginalis</i> | 101         | <i>Contig</i> | 1.5  | 43   | GCA_000165615.<br>2 |
| <i>Gardnerella vaginalis</i> | 0288E       | <i>Contig</i> | 1.7  | 41   | GCA_000263555.<br>1 |
| <i>Gardnerella vaginalis</i> | 00703Dmash  | <i>Contig</i> | 1.5  | 43   | GCA_000263635.<br>1 |
| <i>Gardnerella vaginalis</i> | 00703C2mash | <i>Contig</i> | 1.54 | 42   | GCA_000263515.<br>1 |



**Supplementary Figure S1: Cluster 1**

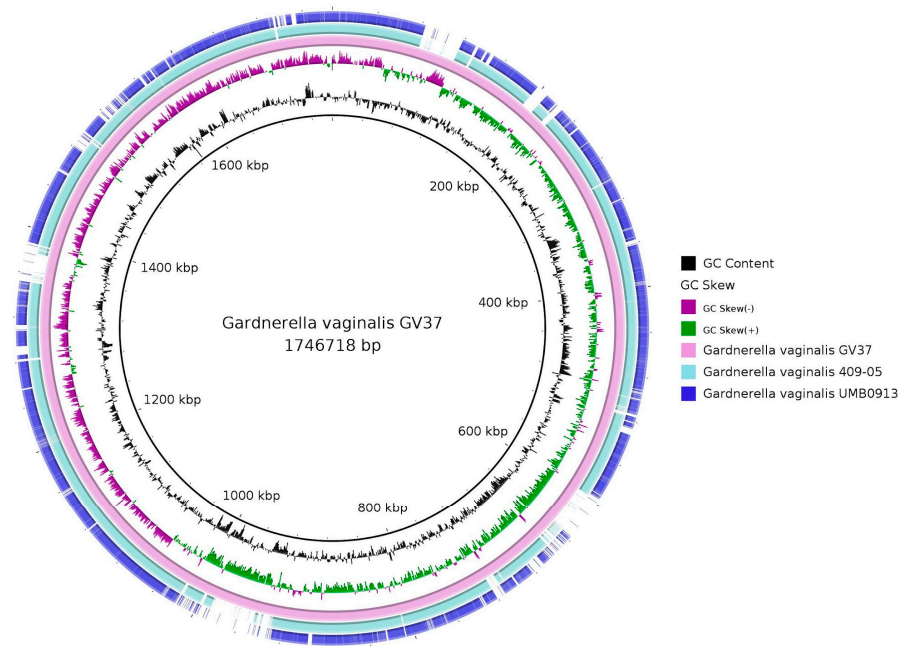

**Supplementary Figure S2: Cluster 2**

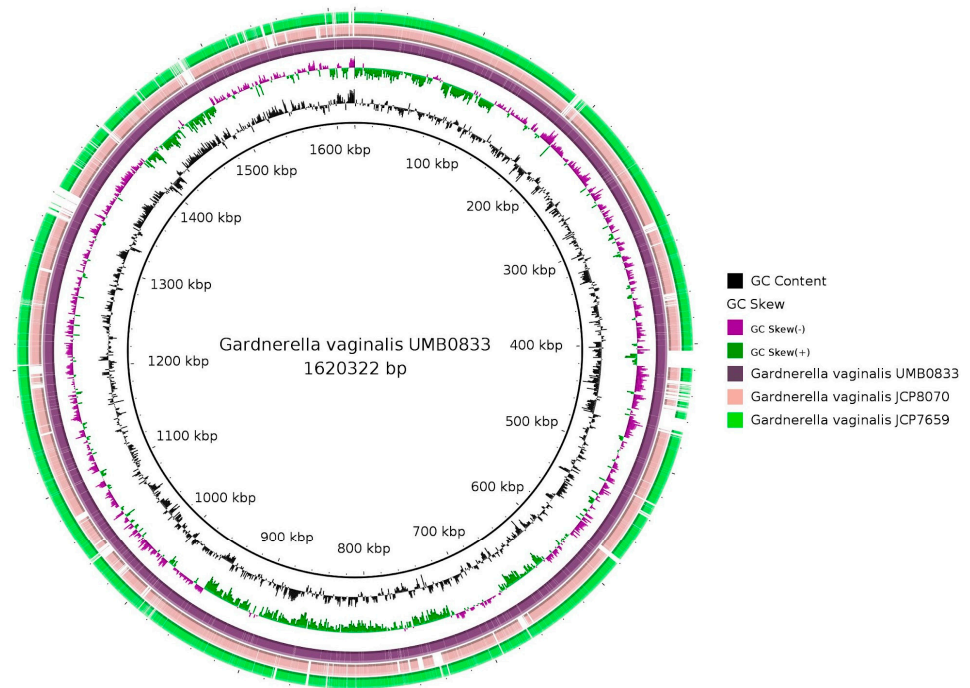

Supplementary Figure S3: Cluster 3

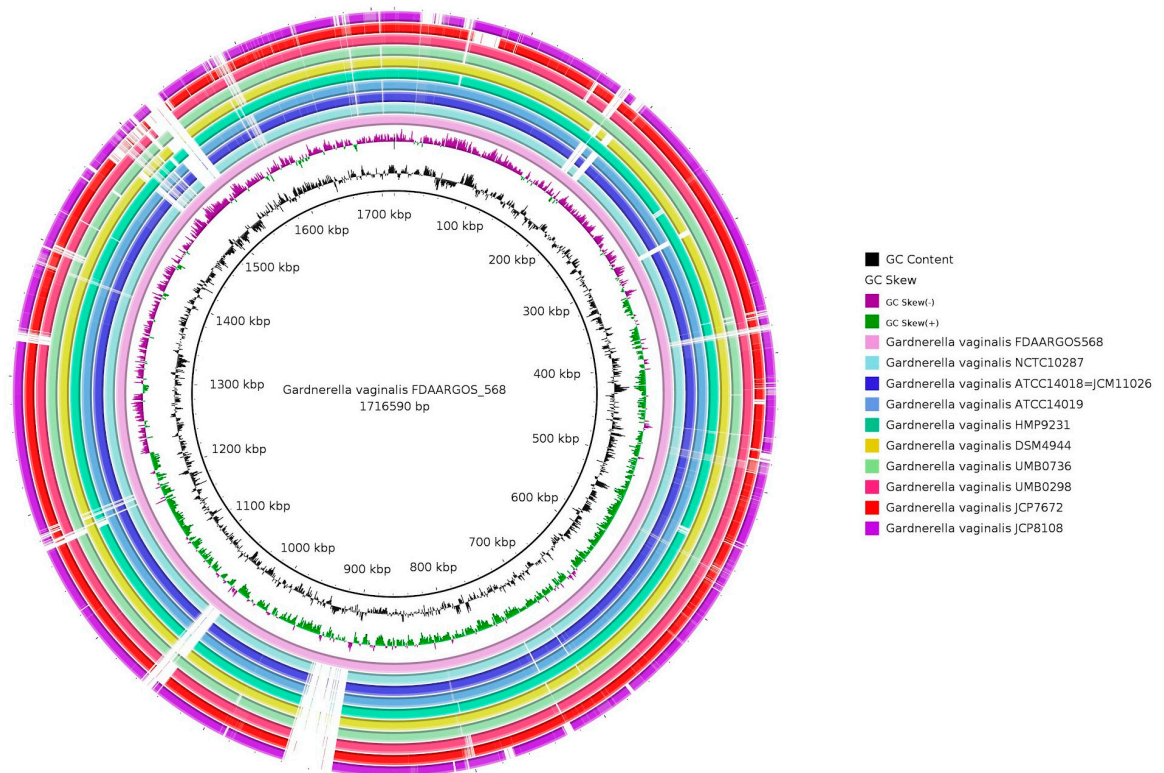

Supplementary Figure S4: Cluster 1

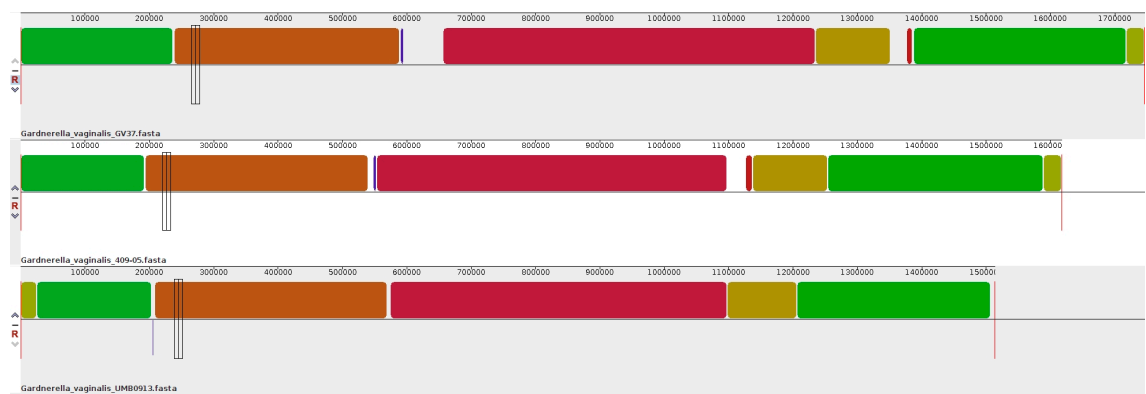

Supplementary Figure S5: Cluster 2

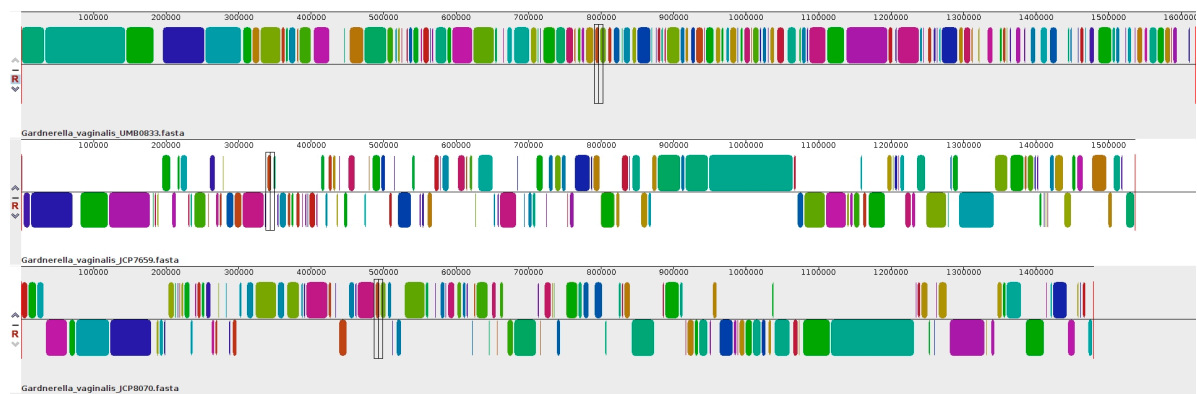

Supplementary Figure S6: Cluster 3

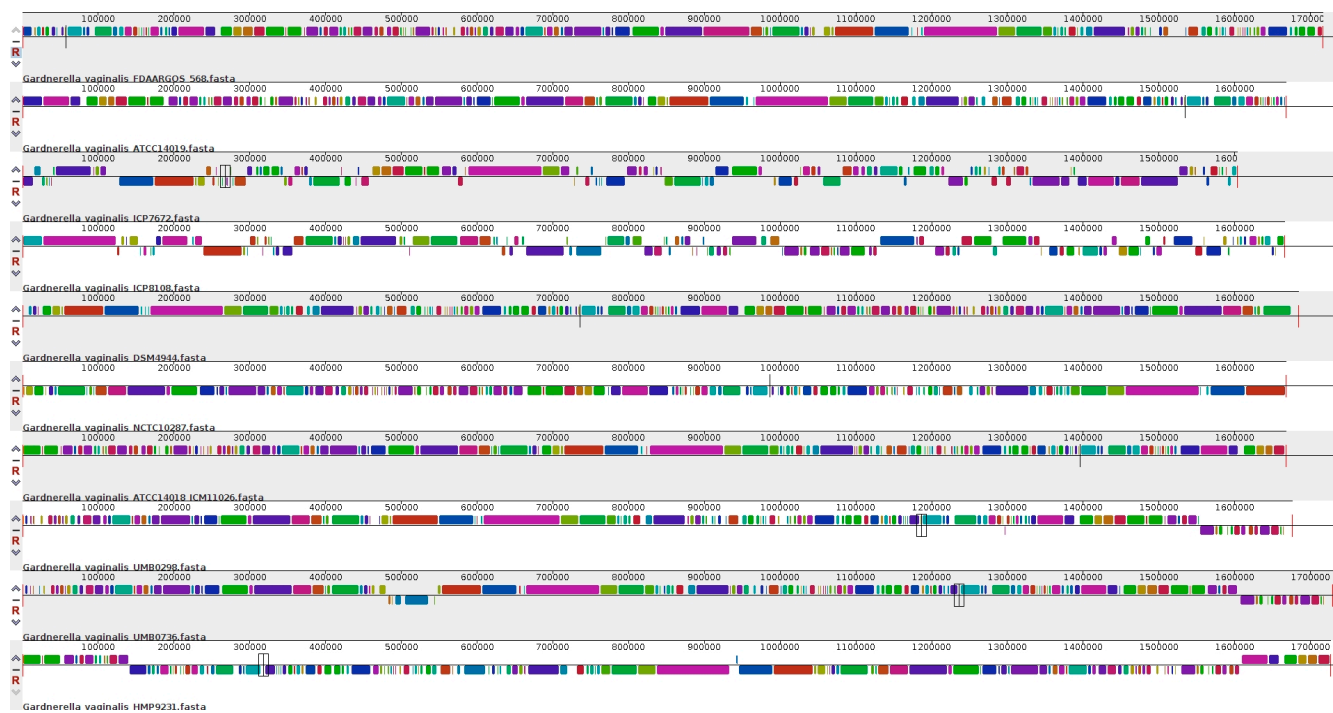

Supplement: s1 [file s1]
